# Supplementary material for: αVβ3 Integrin regulates astrocyte reactivity
Source: Springer Nature journal article supplement (doi:10.1186/s12974-017-0968-5), 2017-09-29

# Additional File: Figure S1

A Rat primary astrocytes

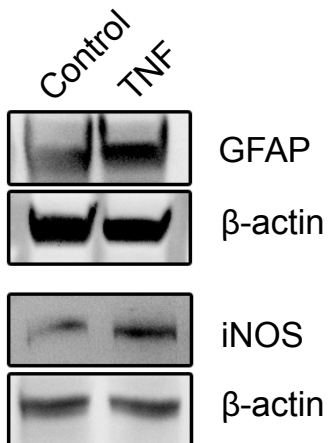

B

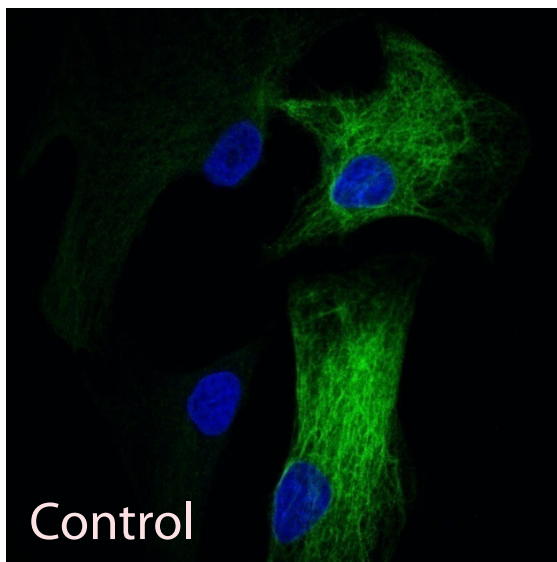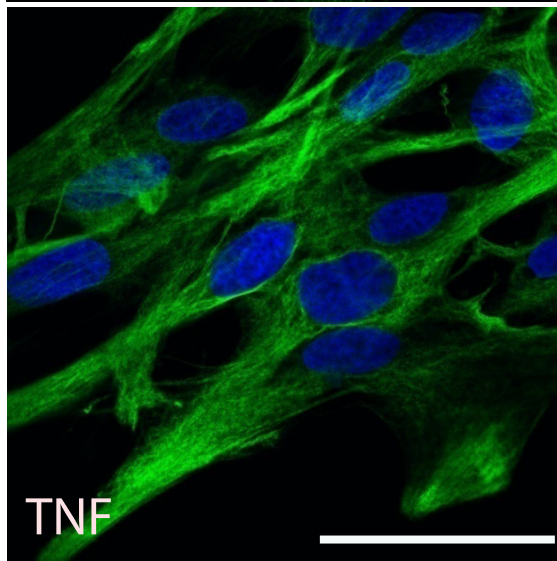

C

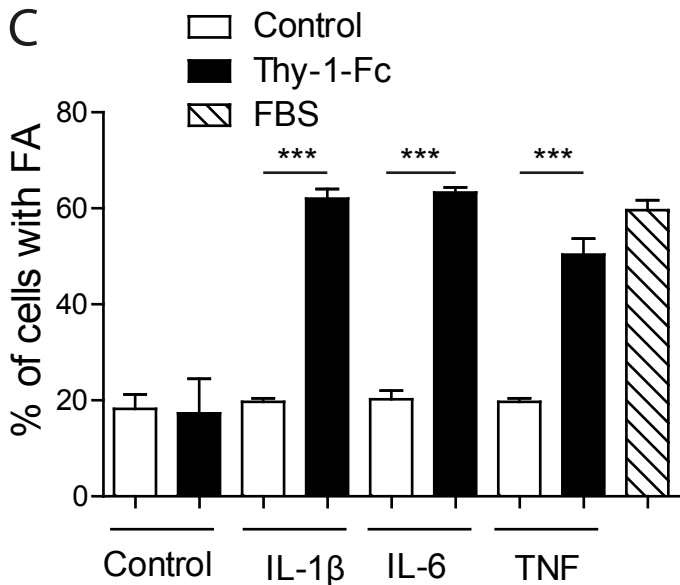

Supplement: MOESM1 [file 15094996]
